# Supplementary material
Source: HighWire-hosted journal article supplement (https://erj.ersjournals.com/content/57/2/2100079)
Supplement: inline-supplementary-material-1 [file inline-supplementary-material-1.pdf]

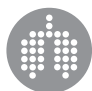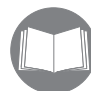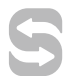

SHAREABLE PDF

# The case of methotrexate and the lung: Dr Jekyll and Mr Hyde

Vincent Cottin <sup>1,2</sup>, Elizabeth Bendstrup <sup>3</sup>, Philippe Bonniaud<sup>4</sup>,  
Mouhamad Nasser <sup>1,2</sup>, Paolo Spagnolo<sup>5</sup>, Claudia Valenzuela <sup>6</sup> and  
Martin Kolb <sup>7</sup>

**Affiliations:** <sup>1</sup>Dept of Respiratory Medicine, National Coordinating Reference Center for Rare Pulmonary Diseases, Louis Pradel Hospital, Hospices Civils de Lyon, Lyon, France. <sup>2</sup>University of Lyon, INRAE, IVPC, Lyon, France. <sup>3</sup>Center for Rare Lung Diseases, Dept of Respiratory Diseases and Allergy, Aarhus University Hospital, Aarhus, Denmark. <sup>4</sup>Constitutive Reference Center for Rare Pulmonary Diseases, Dept of Pulmonary Medicine and Intensive Care Unit, University Hospital, Bourgogne-Franche-Comté, Burgundy University, Inserm 1231, Dijon, France. <sup>5</sup>Respiratory Disease Unit, Dept of Cardiac, Thoracic, Vascular Sciences and Public Health, University of Padova, Padova, Italy. <sup>6</sup>Pulmonology Dept, Hospital Universitario de la Princesa, Universidad Autonoma de Madrid, Madrid, Spain. <sup>7</sup>Dept of Respiratory Medicine, Pathology and Molecular Medicine, McMaster University, Hamilton, ON, Canada.

**Correspondence:** Dept of Respiratory Medicine, National Coordinating Reference Center for Rare Pulmonary Diseases, Louis Pradel Hospital, Hospices Civils de Lyon, 28 avenue Doyen Lepine, 69677 Lyon cedex, Lyon, France. E-mail: [vincent.cottin@chu-lyon.fr](mailto:vincent.cottin@chu-lyon.fr)

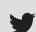

@ERSpublications

**Methotrexate can induce subacute hypersensitivity pneumonitis, a potentially lethal condition that should lead to drug discontinuation; however, its use does not seem to be associated with increased risk of chronic fibrosing ILD in rheumatoid arthritis** <https://bit.ly/3sCyjji>

**Cite this article as:** Cottin V, Bendstrup E, Bonniaud P, *et al.* The case of methotrexate and the lung: Dr Jekyll and Mr Hyde. *Eur Respir J* 2021; 57: 2100079 [<https://doi.org/10.1183/13993003.00079-2021>].

This single-page version can be shared freely online.

Involvement of the respiratory system, the commonest extra-articular manifestation of rheumatoid arthritis (RA), occurs to some extent in a large proportion of patients with RA. Any of the pulmonary compartments can be affected, either secondary to RA itself, or in relation to drug toxicity or opportunistic infection [1]. RA-associated interstitial lung disease (RA-ILD) is an increasingly recognised complication of RA, in many ways similar to idiopathic pulmonary fibrosis [2]. Clinically relevant RA-ILD may be present in up to 10% of patients with RA, and is associated with significant morbidity and mortality [1, 3], with no optimal treatment determined.
